1 **Behavioral and biochemical effects of ethanol withdrawal in zebrafish**

2 Suianny Nayara da Silva Chaves<sup>1</sup>, Gabriel Felício Rocha<sup>1</sup>, Bruna Patrícia Dutra Costa<sup>1,4</sup>, Witallo

3 Etevaldo Araújo de Oliveira<sup>2</sup>, Monica Gomes Lima<sup>3,4</sup>, Diógenes Henrique de Siqueira Silva<sup>1,4</sup>, Caio

4 Maximino<sup>1,4,5\*</sup>

5

6 <sup>1</sup> Laboratório de Neurociências e Comportamento, Instituto de Estudos em Saúde e Biológicas,

7 Universidade Federal do Sul e Sudeste do Pará

8 <sup>2</sup> Escola Estadual de Ensino Médio Anísio Teixeira

9 <sup>3</sup> Laboratório de Neurofarmacologia e Biofísica, Campus VIII, Universidade do Estado do Pará

10 <sup>4</sup> Programa de Pós-Graduação em Biodiversidade e Biotecnologia – Rede BIONORTE

11 <sup>5</sup> Programa de Pós-Graduação em Neurociências e Comportamento, Universidade Federal do Pará

12

13

14

15 **\* Corresponding author:**

16 Caio Maximino

17 Laboratório de Neurociências e Comportamento – Instituto de Estudos em Saúde e Biológicas,

18 Universidade Federal do Sul e Sudeste do Pará, Unidade III

19 Av. dos Ipês, S/N, s/ CEP, Bairro Cidade Jardim, Marabá/PA, Brazil

20 [cmaximino@unifesspa.edu.br](mailto:cmaximino@unifesspa.edu.br)

21 **Abstract:** Chronic alcohol use induces adaptations and toxicity that can induce symptoms of  
22 anxiety, autonomic hyperarousal, and epileptic seizures when alcohol is removed (withdrawal  
23 syndrome). Zebrafish has recently gained wide attention as a behavioral model to study the  
24 neurobehavioral effects of acute and chronic alcohol use, including withdrawal. The literature,  
25 however, is very contradictory on findings regarding withdrawal effects, with some studies  
26 reporting increased anxiety, while others report no effect. A meta-analytic approach was taken to  
27 find the sources of this heterogeneity, and ethanol concentration during exposure and exposure  
28 duration were found to be the main sources of variation. A conceptual replication was also made  
29 using continuous exposure for 16 days in waterborne ethanol (0.5%) and assessing anxiety-like  
30 behavior in the light/dark test after 60 min withdrawal. Withdrawal was shown to reduce preference  
31 for darkness, consistent with decreased anxiety, but to increase risk assessment, consistent with  
32 increased anxiety. Animals were also subjected to the withdrawal protocol and injected with  
33 pilocarpine in a sub-convulsive dose to assess susceptibility to epileptic seizure-like behavior. The  
34 protocol was sufficient to increase susceptibility to epileptic seizure-like behavior in animals  
35 exposed to ethanol. Finally, withdrawal also decreased catalase activity in the brain, but not in the  
36 head kidney, suggesting mechanisms associated with the behavioral effects of ethanol withdrawal.

37 **Keywords:** Anxiety; *Danio rerio*; Ethanol withdrawal; Catalase activity; Epileptic seizures.

## 38 **1. Introduction**

39           Chronic alcohol (ethanol, EtOH) use produces adaptations and toxicity that can lead to  
40 tolerance and dependence, manifested as physical and mental distress when EtOH is removed  
41 (withdrawal); symptoms of ethanol withdrawal include anxiety, insomnia, and autonomic  
42 hyperarousal (Krystal and Tabakoff, 2002). In more serious conditions, patients presenting this  
43 EtOH withdrawal syndrome can present perceptible changes, agitation, mental confusion, significant  
44 increases in autonomic arousal, and epileptic seizures (Gatch and Lal, 2001; Krystal and Tabakoff,  
45 2002). The most serious condition involves *delirium tremens* and death by hyperthermia, cardiac  
46 arrhythmia, and complications from withdrawal-induced epileptic seizures (Longo and Schuckit,  
47 2014). These symptoms also present with a typical time course, with marked signs of anxiety  
48 appearing as early as 6 hours after cessation of alcohol consumption, and epileptic seizures  
49 appearing from 12 to 48 hours after withdrawal (Trevisan et al., 1998). Since withdrawal symptoms  
50 are usually reduced after EtOH consumption, EtOH dependence can be maintained by negative  
51 reinforcement (Koob and Le Moal, 2008), and therefore investigating these motivational  
52 mechanisms could open new avenues for the treatment of EtOH consumption-related disorders.

53           In animal models, EtOH withdrawal changes the excitability of neurons located in brain  
54 regions associated with defensive behavior, anxiety, and fear (Bonassoli et al., 2011; Chakravarty  
55 and Faingold, 1998; Long et al., 2007; Yang et al., 2003, 2002, 2001). Moreover, EtOH withdrawal  
56 also dysregulates the activity of the hypothalamus-pituitary-adrenal axis that modulates behavioral  
57 and endocrine responses to stress (Rasmussen et al., 2002). It makes sense, then, that the majority of  
58 animal models of EtOH withdrawal are focused on anxiety-like behavior, with consistent effects  
59 observed in rodent models such as the elevated plus-maze, light/dark box, social interaction test,  
60 and a drug discrimination assay using pentylenetetrazole (Gatch and Lal, 2001).

61           Zebrafish (*Danio rerio*) is increasingly being considered as useful model organisms for  
62 studying both behavioral genetics and behavioral neuroscience, neuropsychopharmacology, and

63 neurotoxicology (Bonan and Norton, 2015; Kalueff et al., 2012; Norton and Bally-Cuif, 2010;  
64 Shams et al., 2018; Stewart et al., 2015). The main advantages associated with this species are its  
65 low cost of acquisition and upkeep, ease handling, short lifespan, and readiness of reproduction in  
66 laboratory environments (Gerlai, 2014; Kalueff et al., 2014). The relatively high degree of genetic,  
67 neural, and endocrine homology with rodents and human beings is also cited as an advantage  
68 (Kokel and Peterson, 2008). Zebrafish is also a good model for studying anxiety and stress, with  
69 well-validated assays for novelty- and conflict-induced anxiety, social interaction, and antipredatory  
70 behavior (Gerlai, 2010; Maximino et al., 2010; Oliveira, 2013). Importantly for EtOH withdrawal,  
71 epileptic seizure-like behaviors were also characterized in the species (Hortopan et al., 2010),  
72 although not yet in a context of EtOH withdrawal.

73 Zebrafish anxiety-like behavior has been used to demonstrate the effects of drug withdrawal,  
74 including cocaine (López-Patiño et al., 2008a, 2008b), morphine (Cachat et al., 2010; Khor et al.,  
75 2011; Wong et al., 2010), and EtOH (Tran et al., 2016). In the last case, the literature is  
76 inconsistent, with some studies (e.g., Tran et al., 2015) reporting significant effects of withdrawal  
77 on anxiety-like behavior, while others (e. g., Cachat et al., 2010) were unable to detect effects of  
78 EtOH withdrawal. Procedural differences, such as assay type, strain, concentration during exposure,  
79 or withdrawal duration, could be responsible for this difference.

80 One important consistency that is found in the literature regards results using the light/dark  
81 test. For example, Benneh et al. (2016) and Mathur and Guo (2011) found no effect of withdrawal  
82 on dark preference, while Holcombe et al. (2013) found that zebrafish subjected to EtOH  
83 withdrawal reversed their preference, spending more time in the white compartment instead of the  
84 black compartment. The light/dark test is conceptually different from the novel tank test (one of the  
85 most commonly used assays in zebrafish withdrawal research) in that an approach-avoidance  
86 conflict appears to underline behavior in the light/dark test, while escape from the top appears to  
87 motivate behavior in the novel tank test (Maximino et al., 2012); a recent metanalysis (Kysil et al,

88 2017) also suggested that the light/dark test is more sensitive to pharmacological treatments than the  
89 novel tank test. The discrepancies in the literature regarding the effects of EtOH withdrawal on both  
90 tests could represent different underlying neurobiological bases, or methodological differences.

91 In addition to these behavioral endpoints, neurochemical analyses and oxidative stress  
92 assays were also reported in zebrafish models of EtOH withdrawal (Müller et al., 2017; Tran et al.,  
93 2015b). After exposure to 0.5% EtOH for 22 days, increases in brain levels of dopamine, serotonin,  
94 and aspartate were observed with 60 min withdrawal (Pan et al., 2012). After exposure for 8 days to  
95 1% EtOH (for 20 min per day), decreases in superoxide dismutase and catalase activity and  
96 consequent increases in oxidative stress were observed (Müller et al., 2017). While a mechanistic  
97 explanation is still lacking, these results are congruent with the hyperexcitability and EtOH-induced  
98 neurotoxicity observed in other models (Krystal and Tabakoff, 2002; Zenki et al., 2014).

99 The aim of the present work is to study the heterogeneity of effects of EtOH withdrawal on  
100 zebrafish anxiety-like behavior in the literature, by applying meta-analytical techniques. Moreover,  
101 the present work attempts a conceptual replication of findings on EtOH withdrawal by assessing the  
102 effects of a withdrawal protocol on behavior in the light/dark test. It also attempts to expand the  
103 range of endpoints used in withdrawal research by using a chemically-induced epileptic seizure-like  
104 behavior model with sub-convulsive doses. Finally, the present work also attempted to replicate  
105 previous research on the effects of EtOH withdrawal on the activity of the enzyme catalase in the  
106 brain and head kidney. This manuscript is a complete report of all the studies performed to test the  
107 effect of ethanol withdrawal on anxiety-like and convulsive-like behavior in zebrafish. We report  
108 how we determined our sample size, all data exclusions (if any), all data transformations, and all  
109 measures in the study (Simmons et al., 2012).

110

## 111 **2. Methods**

### 112 *2.1 Systematic review and metanalysis*

113 The protocol for the meta-analysis was pre-registered in the CAMARADES-NC3Rs  
114 Preclinical Systematic Review & Meta-analysis Facility (SyRF) database  
115 (<https://drive.google.com/file/d/0B7Z0eAxKc8ApUjcyQjhwVnFjRFE/view?usp=sharing>). No  
116 modification from the pre-registered protocol was made. Article with the descriptors ‘ethanol  
117 withdrawal’ and ‘zebrafish’ were searched for in PubMed (<https://www.ncbi.nlm.nih.gov/pubmed>),  
118 using a search filter optimized to finding studies on animal experimentation on PubMed (Hooijmans  
119 et al., 2010). Bibliographic data (including DOI, publication date, title, and abstract) from the  
120 studies identified in the systematic review were exported to a spreadsheet. Each article from the list  
121 was reviewed in four levels of detail (title, abstract, full text, and a detailed revision of the  
122 experimental design) in order to determine its eligibility to meta-analysis. Following Mohammad et  
123 al. (2016), studies should include (1) primary behavioral data obtained in tests for anxiety-like  
124 behavior in zebrafish (light/dark test, novel tank test, antipredator responses, shoaling responses);  
125 (2) reporting of appropriate controls; and (3) reporting of at least sample sizes and summary  
126 statistics (central tendency and dispersion measures) for control and withdrawal groups. While the  
127 light/dark and novel tank tests, as well as antipredator responses, straightforwardly represent  
128 anxiety-like behavior, shoaling has been included because it is sensitive to manipulations which  
129 increase anxiety and/or fear in zebrafish (Green et al., 2012), suggesting a defensive component.  
130 When an experiment evaluated the effects of drugs or other interventions on withdrawal syndrome-  
131 like effects, only control and EtOH withdrawal groups were considered, and data on intervention  
132 effects was not analyzed; e.g., while Pittman and Hylton (2015) assessed the effects of fluoxetine  
133 and ketamine on withdrawal-induced anxiogenesis, these effects were not assessed in the  
134 metanalysis. Possible confounds in relation to the role of development were reduced by excluding  
135 studies which were not performed on adult fish.

136 The following data were extracted from each included study: identification (DOI, authors,  
137 publication year); strain/phenotype; concentration of ethanol during exposure; duration of EtOH

138 treatment; duration of withdrawal; behavioral test that was used; means and standard deviations, as  
139 well as a test statistics and degrees of freedom; and sample sizes ( $N$ ) for each group. Data, which  
140 were represented graphically, were extracted from figures using PlotDigitizer  
141 (<http://plotdigitizer.sourceforge.net/>). When multiple dependent variables were reported, only the  
142 primary endpoint was used (time on white, time on bottom, inter-fish distance, and distance from  
143 stimulus). While there is considerable variation in the effects of interventions on these tasks – and  
144 indeed variables such as erratic swimming or freezing can be more sensitive to certain treatments –,  
145 the literature usually refers to time on white and time on bottom as the primary endpoints. Distance  
146 from stimulus was used as a primary endpoint for the shoaling and antipredator behavior  
147 experiments made by Robert Gerlai’s group, given that it indicates increased shoaling (decreased  
148 distance to shoal stimulus) or predator avoidance (increased distance to predator stimulus). All  
149 estimates were transformed to standardized mean differences (SMD), corrected for its positive bias  
150 (Hedges and Olkin, 1985), with unbiased estimates of sampling variances and confidence intervals  
151 at the 95% level,  $I^2$  and  $\tau^2$  heterogeneity values, and p-values using a mixed-effects model, with  
152 concentration, exposure duration, and withdrawal duration used as moderators. Differently from the  
153 other endpoints, decreased distances to the shoal stimulus or decreased inter-fish distances indicate  
154 less anxiety, and the SMDs for these cases were transformed by multiplying by -1 (Vesterinen et al.,  
155 2014). Influential case diagnostics was made by inspecting plots for externally standardized  
156 residues, DFFITS values, Cook’s distances, covariance ratios, estimates of  $\tau^2$  and test statistics for  
157 residual heterogeneity when each study is removed in turn, hat values, and weights for each study  
158 included in the analysis. Publication bias was assessed by inspection of a contour-enhanced funnel  
159 plot, with contours at the 90%, 95% and 99% confidence intervals. Moreover, funnel plot  
160 asymmetry was analyzed using a meta-regression test, with total samples size as predictor (Egger et  
161 al., 1997). Observed power for each study was calculated based on effect sizes, sample sizes and  
162 standard deviations, and fitted against SMDs by a generalized additive model with Gaussian curve

163 family and identity link function. Finally, a sensitivity analysis was performed by adding study  
164 quality, assessed using SYRCLE's Risk of Bias (RoB) tool (Hooijmans et al., 2014), in the meta-  
165 regression model. The meta-analysis was made with the metafor package from R (Viechtbauer,  
166 2010).

167

168 *2.2. Effects of EtOH withdrawal on anxiety-like behavior and epileptic seizure-like behavior*  
169 *susceptibility in zebrafish*

170 2.1.1. Animals, housing, and baseline characteristics

171 Outbred populations were used due to their increased genetic variability, decreasing the  
172 effects of random genetic drift which could lead to the development of uniquely heritable traits  
173 (Parra et al., 2009; Speedie and Gerlai, 2008). Thus, the animals used in the experiments are  
174 expected to better represent the natural populations in the wild. Twenty-four-adult zebrafish from  
175 the wildtype strain (longfin phenotype) were used in this experiment. Animals were bought from a  
176 commercial seller, and arrived in the laboratory with 3 months of age, approximately (standard  
177 length =  $13.2 \pm 1.4$  mm), and were quarantined for two weeks; the experiment begun when animals  
178 had an approximate age of 4 months (standard length =  $23.0 \pm 3.2$  mm). Animals were kept in  
179 mixed-sex tanks during acclimation, with an approximate ratio of 50 male: 50 female. The breeder  
180 was licensed for aquaculture under Ibama's (Instituto Brasileiro do Meio Ambiente e dos Recursos  
181 Naturais Renováveis) Resolution 95/1993. Animals were group-housed in 40 L tanks, with a  
182 maximum density of 25 fish per tank, for at least 2 weeks before experiments begun. Tanks were  
183 filled with non-chlorinated water at room temperature (28°C) and a pH of 7.0-8.0. Lighting was  
184 provided by fluorescent lamps in a cycle of 14-10 hours (LD), according to standards of care for  
185 zebrafish (Lawrence, 2007). Water quality parameters were as follow: pH 7.0-8.0; hardness 100-  
186 150 mg/L CaCO<sub>3</sub>; dissolved oxygen 7.5-8.0 mg/L; ammonia and nitrite < 0.001 ppm. All



187 manipulations minimized their potential suffering of animals, and followed Brazilian legislation  
188 (Conselho Nacional de Controle de Experimentação Animal - CONCEA, 2017). Animals were used  
189 for only one experiment and in a single behavioral test, to reduce interference from apparatus  
190 exposure.

191

### 192 2.2.2. Ethanol exposure and withdrawal

193 The EtOH exposure and withdrawal regimen was adapted from Gerlai et al. (2009)□. In  
194 brief, animals were exposed to increasing EtOH concentrations (0.125%-0.5%), dispersed on the  
195 tank water, for 16 days, therefore decreasing mortality that is associated with prolonged exposure to  
196 EtOH in zebrafish. Concentrations doubled every four days, reaching a final concentration of 0.5%  
197 (v/v). Animals were kept in this final concentration for 4 days. Another group was exposed to the  
198 same manipulation, without EtOH exposure; animals were randomly allocated to treatments *via*  
199 generation of random numbers using the randomization tool in <http://www.randomization.com/>.  
200 Caretakers were blinded for treatment. After treatment, animals were transferred to a tank with  
201 system water for 60 min (withdrawal stage). All animals were included in the experiments, and no  
202 gross physical abnormalities were observed during the exposure period. To control for effects of  
203 chronic EtOH exposure that are not attributable to withdrawal, two additional groups of 8 animals  
204 were exposed as above and transferred, without an withdrawal stage, to the light/dark tank.

205

### 206 2.2.3. Light/dark test

207 After EtOH withdrawal, animals (10 animals in the control group, 14 in the withdrawal  
208 group) were individually tested in a tank (15 cm height X 10 cm width X 45 cm length) that was  
209 divided in half into a black compartment and a white compartment. The tank was made of matte  
210 acrylic. The apparatus was illuminated from above by two fluorescent 25 W lamps, which produced

211 an average of 270 lumens above the tank (light levels were measured using a hand photometer). The  
212 tank contained sliding doors that defined a central compartment in which the animal was positioned  
213 for a 3-min acclimation. After this stage, the sliding doors were removed, allowing the animal to  
214 freely explore the apparatus for 15 min.

215 The order with which animals were exposed to the tank was randomized and balanced  
216 across treatments. Experimenters were blinded to treatment. Videos were manually transcribed by  
217 two observers, blinded to treatment, using X-Plo-Rat (<https://github.com/lanec-unifesspa/x-plo-rat>).  
218 The following variables were analyzed: time on the white compartment (s); transitions to white;  
219 total locomotion on white (number of virtual 4.5 cm<sup>2</sup> squares crossed by the animal in the  
220 compartment); mean duration of entries in the white compartment (total duration divided by the  
221 number of transitions); time freezing (s); number of erratic swimming events; time in thigmotaxis  
222 (s); number of risk assessment events. Operational definitions of these endpoints can be found in  
223 **Table 1.**

224 Data were analyzed via approximative two-sample Fisher-Pitman permutation tests with  
225 10.000 Monte-Carlo re-samplings. The data analyst was blinded to treatment by cell scrambling;  
226 after analysis, data was unblinded. Data are presented using individual dot plots combined with  
227 summaries of mean and bootstrapped confidence intervals at 95% level. Standardized mean  
228 differences with unbiased variance estimates were calculated using the R package ‘metafor’. *Post-*  
229 *hoc* (observed) power was calculated based on an approximation of the T-test, with two-tailed  
230 hypotheses. All analyses and graphs were made using R version 3.3.0 and packages ‘ggplot2’ and  
231 ‘coin’.

232

233 2.2.4. Pilocarpine-induced epileptic seizure-like behaviors

234 Immediately after the light/dark test, animals were injected with a dose of 150 mg/kg of  
235 pilocarpine. This dose has been shown to be insufficient to produce clonic and tonic-clonic epileptic  
236 seizure-like behavior in adult animals (Pinto, 2015). Fifteen minutes after injection, animals were  
237 individually transferred to 1.5 L tanks, and filmed for 15 min to analyze the profile of epileptic  
238 seizure-like behavior. Epileptic seizure-like behaviors were scored according to Mussulini et al.  
239 (2013), as in **Table 2**.

240 Score 4 is the minimum behavioral phenotype that can be considered epileptiform  
241 (Mussulini et al., 2013); therefore, the latency to reach Score 4 was considered as the main endpoint  
242 for epileptic seizure-like behavior. Latencies were analyzed by fitting a Kaplan-Meier model to  
243 survival curves, using the R package ‘survival’.

244

### 245 *2.3. Effects of EtOH withdrawal on catalase activity*

246 A separate group of 12 animals were used in this experiment. Animals were subjected to the  
247 exposure and withdrawal regimen described in 2.2.1. Sixty minutes after withdrawal, animals were  
248 euthanized in cold water followed by spinal section, and their brains and head kidneys were  
249 dissected. Catalase activity in those organs was measured using the rate of disappearance of H<sub>2</sub>O<sub>2</sub>  
250 spectrophotometrically, following the method described by Aebi (1984). Within-laboratory  
251 validation yielded a linearity of  $r^2 = 0.9849$ , and intermediary repeatability of 0.2364 (IC95%  
252 [0.0042, 0.4686]; Horwitz ratio). Enzyme activity was corrected by protein levels, quantified by the  
253 Bradford method. Differences between groups were analyzed using Approximative Two-Sample  
254 Fisher-Pitman Permutation Tests.

255

## 256 **3. Results**

### 257 *3.1. Metanalysis*

258 To evaluate the effect of EtOH withdrawal on zebrafish anxiety-like behavior, we applied a  
259 mixed-effects meta-regression model on the results from the systematic review. Characteristics  
260 from the articles found in the systematic review can be found in **Table 3**; raw data and analysis  
261 scripts for this meta-analysis can be found in our GitHub repository ([https://github.com/lanec-](https://github.com/lanec-unifesspa/etoh-withdrawal/tree/master/metanalysis)  
262 [unifesspa/etoh-withdrawal/tree/master/metanalysis](https://github.com/lanec-unifesspa/etoh-withdrawal/tree/master/metanalysis)). EtOH concentrations ranged from 0.25% to  
263 3% v/v (median 1%); exposure durations ranged from 7 to 63 days (median 14 days), and  
264 withdrawal durations ranged from 1 to 1.512 h (median 48 h). In general, a high risk of bias was  
265 observed, since most studies did not report blinding or random allocation ([https://github.com/lanec-](https://github.com/lanec-unifesspa/etoh-withdrawal/blob/master/metanalysis/etoh-withdrawal-metanalysis-rob.csv)  
266 [unifesspa/etoh-withdrawal/blob/master/metanalysis/etoh-withdrawal-metanalysis-rob.csv](https://github.com/lanec-unifesspa/etoh-withdrawal/blob/master/metanalysis/etoh-withdrawal-metanalysis-rob.csv)).

267 Behavioral test, strain/phenotype, EtOH concentration, exposure duration, and withdrawal duration  
268 were used as moderators. Results from this analysis are presented in the forest plot found in **Figure**  
269 **1A**. Residual heterogeneity was estimated as  $\tau^2 = 0.1667$ , significantly high ( $QE_{[df = 11]} = 22.6338$ ,  $p$   
270  $= 0.0199$ ), suggesting that although about 88% of the total heterogeneity can be explained by  
271 including the five moderators in the model, other factors might influence the effect. After applying  
272 a permutation test with 1.000 replications, a significant effect of exposure duration ( $p = 0.029$ ) and  
273 EtOH concentration ( $p = 0.001$ ) were found, but the other mediators did not affect withdrawal-like  
274 behavior (**Figures 1B-1D**). The contour-enhanced funnel plot (**Figure 1E**) suggest that most studies  
275 failed to reach statistical significance, with only one study falling in the 95% CI range, and one in  
276 the 99% CI range. Egger's test on this funnel plot did not suggest publication bias ( $t_{[df = 10]} = 0.439$ ,  
277  $p = 0.67$ ). An analysis of influential observations suggests that the Mathur and Guo (2011) study on  
278 the effects on the NTT with the longer withdrawal duration and the Dewari et al. (2016) study  
279 produced most residual heterogeneity (**Figure S1**). Absolute SMDs were significantly explained by  
280 observed power (slope = 1.2819,  $p = 0.0174$ ; **Figure S2**). Finally, sensitivity analysis suggested that  
281 study quality did not influence results, as including RoB scores in the model did not improve fit

282 (model without RoB: AIC = 46.4816, BIC = 50.88=585; model with RoB: AIC = 47.2908, BIC =  
283 50.9218).

284

### 285 3.2. Effects of EtOH withdrawal on anxiety-like behavior in zebrafish

286 Withdrawal increased time on white ( $Z = 2.1207$ ,  $p = 0.0261$ ;  $SMD_{UB} = -0.995$ ; observed  
287 power = 0.6414; **Figure 2A**), without affecting entry duration ( $Z = 0.92305$ ,  $p = 0.4301$ ;  $SMD_{UB} = -$   
288 0.392; observed power = 0.147; **Figure 2B**). Withdrawal did not increase erratic swimming ( $Z =$   
289 1.9389,  $p = 0.0564$ ,  $SMD_{UB} = 0.890$ ; observed power = 0.5467; **Figure 2C**), but it increased risk  
290 assessment ( $Z = 1.9895$ ,  $p = 0.0405$ ,  $SMD_{UB} = 0.918$ ; observed power = 0.5724; **Figure 2D**).  
291 Freezing ( $Z = 0.8082$ ,  $p = 0.7003$ ,  $SMD_{UB} = 0.286$ ; observed power = 0.098; **Figure 2E**) and  
292 thigmotaxis ( $Z = 0.41291$ ,  $p = 0.7024$ ,  $SMD_{UB} = -0.2133$ ; observed power = 0.0718; **Figure 2F**)  
293 were unaffected. As for motor effects, transitions to white were not affected by withdrawal ( $Z =$   
294 0.91765,  $p = 0.3763$ ,  $SMD_{UB} = 0.39$ ; observed power = 0.1469; **Figure 2G**), but total locomotion  
295 was higher in animals exposed to withdrawal ( $Z = 2.5965$ ,  $p = 0.0034$ ,  $SMD_{UB} = 1.31$ ; observed  
296 power = 0.863; **Figure 2H**).

297 To control for effects of chronic exposure, independent groups were chronically exposed to  
298 EtOH (0.5%), and tested in the light/dark test immediately after the last exposure (i.e., without  
299 withdrawal). Animals exposed to EtOH spent more time in the white compartment ( $Z = -1.9535$ ,  $p$   
300 = 0.0467;  $SMD_{UB} = -1.033$ ; observed power = 0.482; Figure S3A), but did not show changes in  
301 entry duration ( $Z = -1.264$ ,  $p = 0.2632$ ;  $SMD_{UB} = 0.611$ ; observed power = 0.204; Figure S3B).  
302 Erratic swimming was decreased by chronic EtOH treatment ( $Z = 2.521$ ,  $p = 0.01$ ;  $SMD_{UB} = 1.516$ ;  
303 observed power = 0.803; Figure S3C), but no changes were observed on risk assessment ( $Z = 0.478$ ,  
304  $p = 0.793$ ;  $SMD_{UB} = 0.212$ ; observed power = 0.058; Figure S3D) or freezing ( $Z = 0.393$ ,  $p = 0.736$ ;  
305  $SMD_{UB} = 0.180$ ; observed power = 0.052; Figure S3E). Thigmotaxis was decreased by chronic

306 EtOH ( $Z = 2.2879$ ,  $p = 0.012$ ;  $SMD_{UB} = 1.295$ ; observed power = 0.671; Figure S3F). Neither  
307 transitions to white ( $Z = -1.790$ ,  $p = 0.074$ ;  $SMD_{UB} = -0.922$ ; observed power = 0.402; Figure S3G)  
308 nor total locomotion ( $Z = -1.643$ ,  $p = 0.097$ ;  $SMD_{UB} = -0.829$ ; observed power = 0.336; Figure  
309 S3H) were changed by chronic treatment with EtOH.

310

### 311 *3.3. Effects of EtOH withdrawal on epileptic seizure-like behavior susceptibility*

312 Only one animal from the control group exhibited Score IV epileptic seizure-like behaviors  
313 after 150 mg/kg pilocarpine, replicating findings from Pinto (2015); therefore, this dose is indeed  
314 sub-convulsive in zebrafish. All animals from the withdrawal group exhibited Score IV epileptic  
315 seizure-like behaviors after 150 mg/kg pilocarpine; after applying a log-rank model for the  
316 differences in latencies to Score IV, a significant difference was seen in the withdrawal group ( $\chi^2_{df=}$   
317  $1] = 8.8$ ,  $p = 0.00308$ ; **Figure 3**). This data can be found in our GitHub repository  
318 (<https://github.com/lanec-unifesspa/etoh-withdrawal/tree/master/seizure>).

319

### 320 *3.4. Effects of EtOH withdrawal on catalase activity*

321 Catalase activity was reduced in the brain of animals exposed to the withdrawal regime ( $Z =$   
322  $2.0885$ ,  $p = 0.0156$ ; **Figure 4A**), while no significant differences were found in the head kidney ( $Z$   
323  $= 1.2547$ ,  $p = 0.1863$ ; **Figure 4B**). Müller et al. (2017) also observed decreased catalase activity in  
324 the brains of zebrafish after 24 h EtOH withdrawal. Data and scripts for this experiment are  
325 available at <https://github.com/lanec-unifesspa/etoh-withdrawal/tree/master/catalase>.

326

## 327 **4. Discussion**

328           The present work reinforced the utility of using zebrafish as a model organism in studying  
329 ethanol withdrawal by searching for broader patterns in the literature, providing a conceptual  
330 replication of some findings regarding anxiety-like behavior and catalase activity, as well as  
331 expanding the range of behavioral domains for study. We found that the literature is inconsistent in  
332 what regards the effects of ethanol withdrawal. This heterogeneity is associated with the great  
333 procedure differences which are reported; the results of the metanalysis suggest that the main  
334 driving factors are ethanol concentration during exposure and exposure duration, with lower  
335 concentrations and longer durations more likely to induce anxiety-like behavior. Moreover, we  
336 found that ethanol withdrawal (after exposing animals for 16 days to 0.5% ethanol and 1 h  
337 withdrawal) decreased scototaxis, but increased risk assessment, in the light/dark test, and  
338 decreased the threshold for chemically-induced epileptic seizure-like behavior.

339           Zebrafish is increasingly being considered as a model organism in behavioral research  
340 (Bonan & Norton, 2015; Kalueff et al., 2012; Norton & Bally-Cuif, 2010; Stewart et al., 2015), with  
341 a great deal of studies on alcohol (Tran et al., 2016). Behavioral effects of drug withdrawal have  
342 been demonstrated with different drugs, including cocaine (López-Patiño, Yu, Cabral, et al., 2008;  
343 López-Patiño, Yu, Yamamoto, et al., 2008) and morphine (Cachat et al., 2010; Khor et al., 2011;  
344 Wong et al., 2010); in all cases, anxiety-like behavior was assessed. In the same direction, ethanol  
345 withdrawal has been studied mainly with models for anxiety-like behavior (Table 3). Our  
346 metanalysis revealed a significant effect of EtOH withdrawal on anxiety-like or defensive behavior  
347 in zebrafish, but a high degree of heterogeneity. Most of the heterogeneity was explained by  
348 procedural aspects; significant effects of exposure duration and EtOH concentration were found,  
349 suggesting that longer exposure and higher concentrations are critical to induce withdrawal. Other  
350 factors, including statistical inference and lack of control factors (Gerlai, 2018), could influence the  
351 heterogeneity as well. Most of the studies were underpowered, and there was an association  
352 between observed power and effect size. Risk of bias (RoB) was very high for all studies, which

353 usually did not report blinding and random allocation; nonetheless, study quality (i.e., RoB) did not  
354 influence the results of the meta-analysis, evidencing the robustness of the method. While publication  
355 bias is a relevant issue in the reproducibility and replicability of zebrafish research (Gerlai, 2018),  
356 no evidence for it was found in the systematic review.

357 Our conceptual replication used 60 min withdrawal, translationally relevant to the initial  
358 symptoms of EtOH withdrawal in humans (which include anxiety symptoms and epileptic seizures;  
359 Trevisan et al., 1998). Using the exposure method described in Gerlai et al. (2009), we showed that  
360 withdrawal reduces scototaxis. This is in line with the “daily-moderate” condition in Holcombe et  
361 al. (2013), which showed a decrease in scototaxis after using the same exposure profile we  
362 presented. As can be deprehended from the meta-analysis, the effect sizes calculated for scototaxis  
363 in Holcombe et al.’s (2013) experiment are similar in direction and magnitude. The Mathur and  
364 Guo (2011) scototaxis study used a higher concentration of EtOH (1%) but a shorter exposure  
365 period (8 days). While Pittman and Ichikawa (2013) used a similar exposure period (14 days), the  
366 concentration was much higher (3%); in both studies, EtOH withdrawal did not affect scototaxis.

367 While following only effects on scototaxis confirms findings reported in Holcombe et al.  
368 (2013), these findings contradict the overall results from the meta-analysis, which suggested that  
369 EtOH withdrawal increases anxiety-like behavior in zebrafish. If other variables are considered,  
370 however, the picture changes, with increases in risk assessment and number of transitions. The  
371 increase in risk assessment is consistent with increased anxiety-like behavior (Maximino et al.,  
372 2014), but, since scototaxis was decreased, this conclusion is only provisional. These results are  
373 difficult to interpret, but could be explained by the increased risk assessment; however, an  
374 exploratory analysis suggests negative correlation between risk assessment and time on white in the  
375 withdrawal group ( $r^2 = -0.443$ , vs.  $-0.122$  in the control group). The increase in transitions without  
376 an apparent increase in locomotion in the white compartment could be interpreted as psychomotor  
377 agitation, an important symptom of EtOH withdrawal.



378           A reduction in scototaxis would be expected of animals chronically exposed to EtOH, which  
379 could decrease anxiety levels, and therefore not be a direct effect of withdrawal. While initially  
380 unplanned, we performed additional experiments to test this hypothesis by exposing a different  
381 group of animals to chronic ethanol and analyzing its behavior without withdrawal. We observed  
382 decreased scototaxis, but we also observed decreased erratic swimming and thigmotaxis. These  
383 results present preliminary evidence that withdrawal itself, and not the chronic exposure to EtOH,  
384 produced the reported behavioral effects.

385           In addition to this behavioral profile, EtOH withdrawal was also shown to decrease the  
386 threshold for chemically-induced epileptic seizure-like behavior in zebrafish. Pilocarpine is a  
387 muscarinic agonist which induces epileptic seizure-like behavior in rodents (Scorza et al., 2009),  
388 and has recently been shown to induce a similar profile in zebrafish (Pinto, 2015). The rationale of  
389 using a sub-convulsive dose is that, if EtOH withdrawal increases susceptibility to epileptic seizure-  
390 like behavior, zebrafish should present epileptic seizure-like behavior with a dose which does not  
391 induce this state in control animals. We observed increased probability of entering Stage 4 epileptic  
392 seizure-like behaviors in EtOH withdrawal animals, and a shorter latency to this event, suggesting  
393 that the protocol presented here is able to model susceptibility to epileptic seizure-like behavior,  
394 increasing the range of endpoints for studying EtOH withdrawal in zebrafish.

395           Finally, we also observed decreased catalase activity in the brain, but not in the head kidney  
396 of EtOH withdrawal animals. Catalase is a detoxifying enzyme that catalyzes the transformation of  
397 hydrogen peroxide, a free radical, into water and oxygen (Aebi, 1984); in the brain, catalase is  
398 poorly expressed, but usually associated with microglial activity (Dringen, 2005). The inhibition of  
399 enzymatic activity observed here replicates results by Müller et al. (2017) in the zebrafish brain; in  
400 that study, however, the exposure duration was shorter (8 days), the concentration of EtOH was  
401 higher (1%), and the pattern of exposure was different (animals were exposed for 20 min per day,  
402 instead of continuously, to ethanol) compared to the present investigation. The lack of effect on the

403 head kidney, where interrenal cells (the teleost functional equivalent of the mammalian adrenal  
404 cortex) lie, suggesting that possible effects on cortisol (e.g., Cachat et al., 2010) are not due to  
405 effects in these cells, but upstream in the hypothalamus-hypophyseal-interrenal axis.

406 The present work contributed to the use of zebrafish as a model in EtOH withdrawal  
407 research by: A) identifying sources of heterogeneity in the literature on EtOH withdrawal and  
408 anxiety-like behavior in the species; B) presenting a conceptual replication of withdrawal-induced  
409 anxiogenesis in the light/dark test; C) extending the behavioral phenotypes to include epileptic  
410 seizure-like behavior susceptibility; and D) replicating the effects on catalase activity, suggesting  
411 that EtOH withdrawal-elicited oxidative stress could be a mechanism of anxiogenesis in the species.  
412 Further work will characterize these mechanisms with care.

413

#### 414 **Acknowledgements**

415 SNSC was the recipient of a CNPq/PIBIC studentship. GRF was the recipient of a CNPq/PIBITI  
416 studentship. WEAO was the recipient of a CNPq/PIBIC-EM studentship to high school students.  
417 This manuscript appeared as a preprint on bioRxiv (doi: 10.1101/201368).

418

#### 419 **References**

- 420 Aebi, H., 1984. Catalase in vitro, in: *Methods in Enzymology*. pp. 121–126. doi:10.1016/S0076-  
421 6879(84)05016-3
- 422 Benneh, C.K., Biney, R.P., Mante, P.K., Tandoh, A., Adongo, D.W., Woode, E., 2017. *Maerua*  
423 *angolensis* stem bark extract reverses anxiety and related behaviours in zebrafish—  
424 Involvement of GABAergic and 5-HT systems. *J. Ethnopharmacol.* 207, 129–145.  
425 doi:10.1016/j.jep.2017.06.012
- 426 Bonan, C.D., Norton, W.H.J., 2015. The utility of zebrafish as a model for behavioural genetics.  
427 *Curr. Opin. Behav. Sci.* 2, 34–38. doi:10.1016/j.cobeha.2014.07.003

- 428 Bonassoli, V.T., Milani, H., Oliveira, R.M.W. de, 2011. Ethanol withdrawal activates nitric oxide-  
429 producing neurons in anxiety-related brain areas. *Alcohol* 45, 641–652.  
430 doi:10.1016/j.alcohol.2010.11.007
- 431 Cachat, J., Canavello, P., Elegante, M., Bartels, B., Hart, P., Bergner, C., Kalueff, A. V, 2010.  
432 Modeling withdrawal syndrome in zebrafish. *Behav. Brain Res.* 208, 371–376.
- 433 Chakravarty, D.N., Faingold, C.L., 1998. Comparison of neuronal response patterns in the external  
434 and central nuclei of inferior colliculus during ethanol administration and ethanol withdrawal.  
435 *Brain Res.* 783, 55–57.
- 436 Conselho Nacional de Controle de Experimentação Animal - CONCEA, 2017. Diretriz brasileira  
437 para o cuidado e a utilização de animais para fins científicos e didáticos - DBCA. Anexo I.  
438 Peixes mantidos em instalações de instituições de ensino ou pesquisa científica. Brasil.
- 439 Dewari, P.S., Ajani, F., Kushawah, G., Kumar, D.S., Mishra, R.K., 2016. Reversible loss of  
440 reproductive fitness in zebrafish on chronic alcohol exposure. *Alcohol* 50, 83–89.  
441 doi:10.1016/j.alcohol.2015.11.006
- 442 Dringen, R., 2005. Oxidative and antioxidative potential of brain microglial cells. *Antioxid. Redox*  
443 *Signal.* 7, 1223-1233. doi: 10.1089/ars.2005.7.1223.
- 444 Egger, M., Smith, G.D., Schneider, M., Minder, C., 1997. Bias in meta-analysis detected by a  
445 simple, graphical test. *Br. Med. J.* 315, 629–634.
- 446 Gatch, M.B., Lal, H., 2001. Animal models of the anxiogenic effects of ethanol withdrawal. *Drug*  
447 *Dev. Res.* 54, 95–115.
- 448 Gerlai, R., 2014. Fish in behavior research: Unique tools with a great promise! *J. Neurosci.*  
449 *Methods*, 234, 54-58. doi:10.1016/j.jneumeth.2014.04.015
- 450 Gerlai, R., 2018. Reproducibility and replicability in zebrafish behavioral neuroscience research.  
451 *Pharm. Biochem. Behav.*, In press. doi:10.1016/j.pbb.2018.02.005
- 452 Gerlai, R., 2010. Zebrafish antipredatory responses: A future for translational research? *Behav.*  
453 *Brain Res.* 207, 223–231. doi:10.1016/j.bbr.2009.10.008
- 454 Gerlai, R., Ahmad, F., Prajapati, S., Manuscript, A., Populations, A.Z., 2009. Differences in acute  
455 alcohol-induced behavioral responses among zebrafish populations. *Alcohol. Clin. Exp. Res.*  
456 32, 1763–1773. doi:10.1111/j.1530-0277.2008.00761.x
- 457 Green, J., Collins, C., Kyzar, E. J., Pham, M., Roth, A., Gaikwad, S., Cachat, J., Stewart, A. M.,  
458 Landsman, S., Grieco, F., Tegelenbosch, R., Noldus, L. P., Kalueff, A. V., 2012. Automated  
459 high-throughput neurophenotyping of zebrafish social behavior. *J. Neurosci. Methods*, 210,  
460 266-271. doi: 10.1016/j.jneumeth.2012.07.017.
- 461 Hedges, L. V, Olkin, I., 1985. *Statistical methods for meta-analysis.* Academic Press, San Diego.

- 462 Holcombe, A., Howorko, A., Powell, R.A., Schalomon, M., Hamilton, T.J., 2013. Reversed  
463 scototaxis during withdrawal after daily-moderate, but not weekly-binge, administration of  
464 ethanol in zebrafish. *PLoS One* 8, e63319. doi:10.1371/journal.pone.0063319
- 465 Hooijmans, C.R., Rovers, M.M., de Vries, R.B.M., Leenaars, M., Ristskes-Hoitinga, M.,  
466 Langendam, M.W., 2014. SYRCLE's risk of bias tool for animal studies. *BMC Med. Res.*  
467 *Methodol.* 14, 43.
- 468 Hooijmans, C.R., Tillema, A., Leenaars, M., Ritskes-Hoitinga, M., 2010. Enhancing search  
469 efficiency by means of a search filter for finding all studies on animal experimentation in  
470 PubMed. *Lab. Anim.* 44, 170–175.
- 471 Hortopan, G.A., Dinday, M.T., Baraban, S.C., 2010. Zebrafish as a model for studying genetic  
472 aspects of epilepsy. *Dis. Model. Mech.* 3, 144–148. doi:10.1242/dmm.002139
- 473 Kalueff, A. V, Echevarria, D.J., Stewart, A.M., 2014. Gaining translational momentum: More  
474 zebrafish models for neuroscience research. *Prog. Neuropsychopharmacol. Biol. Psychiatry* 55,  
475 1–6. doi:10.1016/j.pnpbp.2014.01.022
- 476 Kalueff, A. V, Gebhardt, M., Stewart, A.M., Cachat, J.M., Brimmer, M., Chawla, J.S., Craddock,  
477 C., Kyzar, E.J., Roth, A., Landsman, S., Gaikwad, S., Robinson, K., Baatrup, E., Tierney, K.,  
478 Shamchuk, A., Norton, W., Miller, N., Nicolson, T., Braubach, O., Gilman, C.P., Pittman, J.,  
479 Rosemberg, D.B., Gerlai, R., Echevarria, D., Lamb, E., Neuhauss, S.C.F., Weng, W., Bally-  
480 Cuif, L., Schneider, H., Zebrafish Neuroscience Research Consortium, 2013. Towards a  
481 comprehensive catalog of zebrafish behavior 1.0 and beyond. *Zebrafish* 10, 70–86.  
482 doi:10.1089/zeb.2012.0861
- 483 Kalueff, A. V, Stewart, A.M., Kyzar, E.J., Cachat, J., Gebhardt, M., Landsman, S., Robinson, K.,  
484 Maximino, C., Herculano, A.M., Jesuthasan, S., Wisenden, B., Bally-Cuif, L., Lange, M.,  
485 Vernier, P., Norton, W., Tierney, K., Tropepe, V., Neuhauss, S.C.F., Zebrafish Neuroscience  
486 Research Consortium, 2012. Time to recognize zebrafish “affective” behavior. *Behaviour* 149,  
487 1019–1036. doi:10.1163/1568539X-00003030
- 488 Khor, B.S., Jamil, M.F., Adenan, M.I., Shu-Chien, A.C., Fadzly, M., Jamil, A., Adenan, M.I., Shu-  
489 A.C., 2011. Mitragynine attenuates withdrawal syndrome in morphine-withdrawn zebrafish.  
490 *PLoS One* 6, e28340. doi:10.1371/journal.pone.0028340
- 491 Kokel, D., Peterson, R.T., 2008. Chemobehavioural phenomics and behaviour-based psychiatric  
492 drug discovery in the zebrafish. *Briefings Funct. Genomics Proteomics* 7, 483–490.
- 493 Koob, G.F., Le Moal, M., 2008. Neurobiological mechanisms for opponent motivational processes  
494 in addiction. *Philos. Trans. R. Soc. Part B* 363, 3113–3123. doi:10.1098/rstb.2008.0094
- 495 Krystal, J.H., Tabakoff, B., 2002. Ethanol abuse, dependence, and withdrawal: Neurobiology and  
496 clinical implications, in: *Neuropsychopharmacology: The Fifth Generation of Progress.*  
497 Lippincott, Williams & Wilkins, Philadelphia, pp. 1425–1443.

- 498 Kysil, E., Meshalkina, D. Frick, E. E., Echevarria, D. J., Rosemberg, D. B., Maximino, C., Lima,  
499 M. G., Abreu, M. S., Giacomini, A. C., Barcellos, L. J. G., Song, C., Kalueff, A. V., 2016.  
500 Comparative analyses of zebrafish anxiety-like behavior using conflict-based novelty tests.  
501 Zebrafish 14, 197-208. doi: 10.1089/zeb.2016.1415.
- 502 Lawrence, C., 2007. The husbandry of zebrafish (*Danio rerio*): A review. Aquaculture 269, 1–20.  
503 doi:10.1016/j.aquaculture.2007.04.077
- 504 Long, C., Yang, L., Faingold, C.L., Evans, M.S., 2007. Excitatory amino acid receptor-mediated  
505 responses in periaqueductal gray neurons are increased during ethanol withdrawal.  
506 Neuropharmacology 52, 802–811. doi:10.1016/j.neuropharm.2006.09.019
- 507 Longo, D.L., Schuckit, M.A., 2014. Recognition and management of withdrawal delirium (*delirium*  
508 *tremens*). N. Engl. J. Med. 371, 2109–2113. doi:10.1056/NEJMra1407298
- 509 López-Patiño, M.A., Yu, L., Cabral, H., Zhdanova, I. V., 2008a. Anxiogenic effects of cocaine  
510 withdrawal in zebrafish. Physiol. Behav. 93, 160–171. doi:10.1016/j.physbeh.2007.08.013
- 511 López-Patiño, M.A., Yu, L., Yamamoto, B.K., Zhdanova, I. V., 2008b. Gender differences in  
512 zebrafish responses to cocaine withdrawal. Physiol. Behav. 95, 36–47.  
513 doi:10.1016/j.physbeh.2008.03.021
- 514 Mathur, P., Guo, S., 2011. Differences of acute versus chronic ethanol exposure on anxiety-like  
515 behavioral responses in zebrafish. Behav. Brain Res. 219, 234–239.  
516 doi:10.1016/j.bbr.2011.01.019
- 517 Maximino, C., Brito, T.M. de, Silva, A.W.B. da, Herculano, A.M., Morato, S., Gouveia Jr, A.,  
518 Marques, T., Brito, D., Waneza, A., Manoel, A., Gouveia, A., 2010. Measuring anxiety in  
519 zebrafish: A critical review. Behav. Brain Res. 214, 157–171. doi:10.1016/j.bbr.2010.05.031
- 520 Maximino, C., Benzecry, R., Matos, K. R. O., Batista, E. J. O., Herculano, A. M., Rosemberg, D.  
521 B., Oliveira, D. L., Blaser, R., 2012. A comparison of the light/dark and novel tank tests in  
522 zebrafish. Behaviour 149, 1099-1123. doi: 10.1163/1568539X-00003029
- 523 Mohammad, F., Ho, J., Lim, C.L., Woo, J.H., Poon, D.J.J., Lamba, B., Claridge-chang, A., 2016.  
524 Concordance and incongruence in preclinical anxiety models: Systematic review and meta-  
525 analyses. bioRxiv. doi:10.1101/020701
- 526 Müller, T.E., Nunes, S.Z., Silveira, A., Loro, V.L., Rosemberg, D.B., 2017. Repeated ethanol  
527 exposure alters social behavior and oxidative stress parameters of zebrafish. Prog. Neuro-  
528 Psychopharmacology Biol. Psychiatry. doi:10.1016/j.pnpbp.2017.05.026
- 529 Mussulini, B.H.M., Leite, C.E., Zenki, K.C., Moro, L., Baggio, S., Rico, E.P., Rosemberg, D.B.,  
530 Dias, R.D., Mello e Souza, T., Calcagnotto, M.E., Campos, M.M., Battastini, A.M.O., de  
531 Oliveira, D.L., 2013. Seizures induced by pentylentetrazole in the adult zebrafish: A detailed  
532 behavioral characterization. PLoS One 8, e54515. doi:10.1371/journal.pone.0054515
- 533 Norton, W., Bally-Cuif, L., 2010. Adult zebrafish as a model organism for behavioural genetics.  
534 BMC Neurosci. 11, 90. doi:10.1186/1471-2202-11-90

- 535 Oliveira, R.F., 2013. Mind the fish: Zebrafish as a model in cognitive social neuroscience. *Front.*  
536 *Neural Circuits* 7, Article 131. doi:10.3389/fncir.2013.00131
- 537 Pan, Y., Chatterjee, D., Gerlai, R., 2012. Strain dependent gene expression and neurochemical levels  
538 in the brain of zebrafish transcriptome: Focus on a few alcohol related targets. *Physiol. Behav.*  
539 In press. doi:10.1016/j.physbeh.2012.01.017
- 540 Parra, K. V., Adrian Jr, J.C., Gerlai, R., 2009. The synthetic substance hypoxanthine 3-N-oxide  
541 elicits alarm reactions in zebrafish (*Danio rerio*). *Behav. Brain Res.* 205, 336–341.  
542 doi:10.1016/j.bbr.2009.06.037
- 543 Pinto, C.B., 2015. Caracterização do perfil de crises epilépticas e dos efeitos comportamentais  
544 induzidos por pilocarpina em peixe-zebra adulto (Doctoral thesis, Universidade Federal do Rio  
545 Grande do Sul). Retrieved from <http://hdl.handle.net/10183/118000>
- 546 Pittman, J., Hylton, A., 2015. Behavioral, endocrine, and neuronal alterations in zebrafish (*Danio*  
547 *rerio*) following sub-chronic coadministration of fluoxetine and ketamine. *Pharmacol.*  
548 *Biochem. Behav.* 139, 158–162. doi:10.1016/j.pbb.2015.08.014
- 549 Pittman, J.T., Ichikawa, K.M., 2013. iPhone® applications as versatile video tracking tools to  
550 analyze behavior in zebrafish (*Danio rerio*). *Pharmacol. Biochem. Behav.* 106, 137–142.  
551 doi:10.1016/j.pbb.2013.03.013
- 552 Rasmussen, D.D., Boldt, B.M., Wilkinson, C.W., Mitton, D.R., 2002. Chronic daily ethanol and  
553 withdrawal: 3. Forebrain pro-opiomelanocortin gene expression and implications for  
554 dependence, relapse, and deprivation effect. *Alcohol. Clin. Exp. Res.* 26, 535–546.
- 555 Shams, S., Rihel, J., Ortiz, J.G., Gerlai, R.T., 2018. The zebrafish as a promising tool for modeling  
556 human brain disorders: A review based upon an IBNS Symposium. *Neurosci. Biobehav. Rev.*  
557 75, 176–190.
- 558 Simmons, J. P., Nelson, L. D., Simonsohn, U., 2012. A 21 Word Solution. *SPSP Dialogue* 26, 1-4.
- 559 Speedie, N., Gerlai, R., 2008. Alarm substance induced behavioral responses in zebrafish (*Danio*  
560 *rerio*). *Behav. Brain Res.* 188, 168–177. doi:10.1016/j.bbr.2007.10.031
- 561 Stewart, A.M., Ullmann, J.F.P., Norton, W.H.J., Parker, M.O., Brennan, C.H., Gerlai, R., Kalueff,  
562 A. V., 2015. Molecular psychiatry of zebrafish. *Mol. Psychiatry* 20, 2–17.  
563 doi:10.1038/mp.2014.128
- 564 Tran, S., Chatterjee, D., Gerlai, R., 2015a. An integrative analysis of ethanol tolerance and  
565 withdrawal in zebrafish (*Danio rerio*). *Behav. Brain Res.* 276, 161–170.  
566 doi:10.1016/j.bbr.2014.02.034
- 567 Tran, S., Faccioli, A., Gerlai, R., 2016. The zebrafish, a novel model organism for screening  
568 compounds affecting acute and chronic ethanol-induced effects. *Int. Rev. Neurobiol.* 126, 467–  
569 484. doi:10.1016/bs.irn.2016.02.016



- 570 Tran, S., Nowicki, M., Chatterjee, D., Gerlai, R., 2015b. Acute and chronic ethanol exposure  
571 differentially alters alcohol dehydrogenase and aldehyde dehydrogenase activity in the  
572 zebrafish liver. *Prog. Neuro-Psychopharmacology Biol. Psychiatry* 56, 221–226.  
573 doi:10.1016/j.pnpbp.2014.09.011
- 574 Trevisan, L. A., Boutros, N., Petrakis, I. K., Krystal, J. H., 1998. Complications of alcohol  
575 withdrawal. *Alcohol Health Res. World* 22, 61-66.
- 576 Vesterinen, H. M., Sena, E. S., Egan, K. J., Hirst, T. C., Churolov, L., Currie, G. L., Antonic, A.,  
577 Howells, D. W., Macleod, M. R. Meta-analysis of data from animal studies: A practical guide.  
578 *J. Neurosci. Methods* 221, 92-102.
- 579 Viechtbauer, W., 2010. Conducting meta-analyses in R with the metafor package. *J. Stat. Softw.* 36,  
580 1–48.
- 581 Wong, K., Elegante, M., Bartels, B., Elkhayat, S., Tien, D., Roy, S., Goodspeed, J., Suci, C., Tan,  
582 J., Grimes, C., Chung, A., Rosenberg, M., Gaikwad, S., Denmark, A., Jackson, A., Kadri, F.,  
583 Chung, K.M., Stewart, A., Gilder, T., Beeson, E., Zapolsky, I., Wu, N., Cachat, J., Kalueff, A.  
584 V, 2010. Analyzing habituation responses to novelty in zebrafish (*Danio rerio*). *Behav. Brain*  
585 *Res.* 208, 450–457. doi:10.1016/j.bbr.2009.12.023
- 586 Yang, L., Long, C., Evans, M.S., Faingold, C., 2002. Ethanol withdrawal results in aberrant  
587 membrane properties and synaptic responses in periaqueductal gray neurons associated with  
588 seizure susceptibility. *Brain Res.* 957, 99–108.
- 589 Yang, L., Long, C., Faingold, C.L., 2001. Neurons in the deep layers of superior colliculus are a  
590 requisite component of the neuronal network for seizures during ethanol withdrawal. *Brain*  
591 *Res.* 920, 134–141.
- 592 Yang, L., Long, C., Randall, M.E., Faingold, C.L., 2003. Neurons in the periaqueductal gray are  
593 critically involved in the neuronal network for audiogenic seizures during ethanol withdrawal.  
594 *Neuropharmacology* 44, 275–281. doi:10.1016/S0028-3908(02)00367-2
- 595 Zenki, K.C., Mussulini, B.H.M., Rico, E.P., de Oliveira, D.L., Rosemberg, D.B., 2014. Effects of  
596 ethanol and acetaldehyde in zebrafish brain structures: An in vitro approach on glutamate uptake  
597 and on toxicity-related parameters. *Toxicol. Vitro.* 28, 822–828. doi:10.1016/j.tiv.2014.03.008  
598

599 **Tables and table legends**

600 **Table 1.** Operational definitions for behavioral endpoints assessed in the light/dark test. Whenever  
601 available, codes used in the Zebrafish Behavioral Catalog (Kalueff et al., 2013) are provided.

---

**Behavioral endpoint Definition**

---

Freezing                      Time spent immobile, with the exception of opercular and eye movements,  
in seconds, observed in the white compartment (ZBC 1.68)

---

Erratic swimming        Sharp changes in direction or velocity of swimming, associated with  
repeated fast acceleration bouts, observed in the white compartment (ZBC  
1.51)

---

Thigmotaxis                Percentage of time swimming in a distance of 2 cm or less from the white  
compartment's walls (ZBC 1.173)

---

Risk assessment         Fast (< 1 second) entries in the white compartment, followed by re-entry in  
the black compartment, or partial entries in the white compartment (i.e., the  
pectoral fin does not cross the midline)

---

602

603 **Table 2.** Behavioral phenotypes scored in the pilocarpine-induced seizure model. Scores were  
604 based on Mussulini et al. (2013).

---

**Score Behavioral phenotype**

---

0                      Short swim mainly in the bottom of the tank.

---

1                      Increased swimming activity and high frequency of opercular movement.

---

2                      Burst swimming, left and right movements, and erratic movements.

---

3                      Circular movements.

---



- 
- 4 Clonic seizure-like behavior (abnormal whole-body rhythmic muscular contraction).
- 
- 5 Fall to the bottom of the tank, tonic seizure-like behavior (sinking to the bottom of the tank, loss of body posture, and principally by rigid extension of the body).
- 
- 6 Death
- 

605

606 **Table 3.** Studies included in the metanalysis. Studies were ordered by strain used (BSF = blue  
 607 shortfin; WT = non-specified wild-type); behavioral assay (LDT = light/dark test; NTT = novel tank  
 608 test); ethanol concentration during exposure ([EtOH]); exposure duration; and withdrawal duration.  
 609

| <b>Study</b>                      | <b>Strain</b> | <b>Assay</b>       | <b>[EtOH]</b> | <b>Exposure duration</b> | <b>Withdrawal duration</b> |
|-----------------------------------|---------------|--------------------|---------------|--------------------------|----------------------------|
| Holcombe et al., 2013             | BSF           | LDT                | 0.2%          | 21 d                     | 48 h                       |
| Tran et al., 2015a                | AB            | NTT                | 0.5%          | 22 d                     | 1 h                        |
| Mathur and Guo, 2011, study 1     | AB            | NTT                | 1%            | 8 d                      | 48 h                       |
| Mathur and Guo, 2011, study 2     | AB            | LDT                | 1%            | 8 d                      | 24 h                       |
| Mathur and Guo, 2011, study 3     | AB            | NTT                | 1%            | 8 d                      | 144 h                      |
| Mathur and Guo, 2011, study 4     | AB            | LDT                | 1%            | 8 d                      | 168 h                      |
| Pittman and Hylton, 2015          | WT            | NTT                | 3%            | 14 d                     | 48 h                       |
| Cachat et al., 2010               | BSF           | NTT                | 0.3%          | 7 d                      | 12 h                       |
| Gerlai et al., 2009, study 1      | WT            | Predator avoidance | 0.25%         | 22 d                     | 1 h                        |
| Gerlai et al., 2009, study 2      | AB            | Predator avoidance | 0.25%         | 22 d                     | 1 h                        |
| Gerlai et al., 2009, study 3      | SF            | Predator avoidance | 0.25%         | 22 d                     | 1 h                        |
| Gerlai et al., 2009, study 4      | WT            | Shoaling           | 0.25%         | 22 d                     | 1 h                        |
| Gerlai et al., 2009, study 5      | AB            | Shoaling           | 0.25%         | 22 d                     | 1 h                        |
| Gerlai et al., 2009, study 6      | SF            | Shoaling           | 0.25%         | 22 d                     | 1 h                        |
| Pittman and Ichikawa, 2013, study | WT            | NTT                | 3%            | 14 d                     | 48 h                       |

1

|                                     |     |          |      |      |        |
|-------------------------------------|-----|----------|------|------|--------|
| Pittman and Ichikawa, 2013, study 2 | WT  | LDT      | 3%   | 14 d | 48 h   |
| Müller et al., 2017                 | BSF | Shoaling | 1%   | 8 d  | 24 h   |
| Benneh et al., 2017, study 1        | WT  | NTT      | 0.5% | 8 d  | 96 h   |
| Benneh et al., 2017, study 2        | WT  | NTT      | 0.5% | 8 d  | 192 h  |
| Benneh et al., 2017, study 3        | WT  | LDT      | 0.5% | 8 d  | 96 h   |
| Benneh et al., 2017, study 4        | WT  | LDT      | 0.5% | 8d   | 192 h  |
| Dewari et al., 2016                 | WT  | NTT      | 0.5% | 63 d | 1512 h |

610

611 **Figure legends**

612 **Figure 1 – Metanalysis of EtOH withdrawal experiments in zebrafish reveal a significant**  
613 **increase in anxiety-like behavior, but high heterogeneity driven by methodological**  
614 **differences.** (A) Forest plot showing the results of 16 studies examining the effect of ethanol  
615 withdrawal on zebrafish anxiety-like behavior. The figure shows the standardized mean difference  
616 (SMD) between control and withdrawal-exposed groups with corresponding 95% confidence  
617 intervals in the individual studies, based on a mixed-effects model. A negative standardized mean  
618 difference (SMD) corresponds to decreased anxiety-like behavior, while a positive SMD  
619 corresponds to increased anxiety-like behavior after ethanol withdrawal. Studies are ordered by  
620 total degrees of freedom. (B-D) Permutation distribution of the test statistic for the mediators:  
621 behavioral test (B), ethanol concentration during exposure (C), exposure duration, in days (D),  
622 withdrawal duration, in hours (E), and strain/phenotype (F). Distributions were based on a  
623 permutation test with 1,000 replications. The blue contour represents kernel density estimates of the  
624 permutation distributions; the red curve represents the standard normal density; the full line  
625 represents the null hypothesis of no difference; and the dashed line represents the observed values  
626 of test statistics. (G) Contour-enhanced funnel plot of meta-analysis. Estimated standardized mean  
627 differences were plotted against precision (1/standard error) were A negative estimate corresponds  
628 to decreased anxiety-like behavior, while a positive estimate corresponds to increased anxiety-like  
629 behavior after ethanol withdrawal. The unshaded region corresponds to p-values greater than 0.1,  
630 the gray-shaded region to p-values between 0.1 and 0.05, the dark gray-shaded region corresponds  
631 to p-values between 0.05 and 0.01, and the region outside of the funnel corresponds to p-values  
632 below 0.01.

633

634 **Figure 2 – Effects of EtOH withdrawal (increasing concentration of up to 0.5% for 16 days,**  
635 **followed by 1 h withdrawal) on behavior in the light/dark test.** (A) Scototaxis; (B) Erratic

636 swimming; (C) Risk assessment; (D) Freezing; (E) Thigmotaxis; (F) Transitions to white; (G)  
637 Locomotion on white. Red dots represent mean, and red error bars represent nonparametric  
638 bootstrapped confidence intervals for the mean at the 95% level. To facilitate visualization, data  
639 points were jittered; therefore, their absolute position does not reflect the actual value, and values  
640 can appear to be below 0.

641

642 **Figure 3 – Effects of EtOH withdrawal (increasing concentration of up to 0.5% for 16 days,**  
643 **followed by 1 h withdrawal) on Score IV seizure latencies after sub-convulsive pilocarpine**  
644 **injection.** Animals were observed after injection of 150 mg/kg pilocarpine in controls (green lines)  
645 and withdrawal (red lines). The dashed lines represent 95% confidence intervals around the Kaplan-  
646 Meier estimates of seizure probability at each time interval.

647

648 **Figure 4 – Effects of EtOH withdrawal (increasing concentration of up to 0.5% for 16 days,**  
649 **followed by 1 h withdrawal) on catalase activity.** Enzyme activity was assessed in (A) brain and  
650 (B) head kidney of zebrafish from control (CTRL) and withdrawal (WD) groups. Red dots represent  
651 mean, and red error bars represent nonparametric bootstrapped confidence intervals for the mean at  
652 the 95% level. To facilitate visualization, data points were jittered; therefore, their absolute position  
653 does not reflect the actual value, and values can appear to be below 0.

654

655 **Figure S1 – Influential study analysis for the metanalysis.** Statistics represent standardized  
656 residuals (rstudent), DFFITS (dffits), Cook's distances (cook.d), covariance ratios (cov.r), estimates  
657 of  $\tau^2$  (tau2.del) and test statistics (QE.del) for (residual) heterogeneity when each study is removed  
658 in turn, hat values, and weights for each of the 16 studies examining the effects of EtOH withdrawal  
659 on zebrafish defensive behavior. Red filling indicates an influential study.

660

661 **Figure S2** – Relationship between observed power and modulus SMD values in the metanalysis.

662 Curve fitting was made using a linear model.

663 **Figure S3** – **Effects of chronic ethanol exposure on behavior in the light/dark test.** (A)

664 Scototaxis; (B) Erratic swimming; (C) Risk assessment; (D) Freezing; (E) Thigmotaxis; (F)

665 Transitions to white; (G) Locomotion on white. Red dots represent mean, and red error bars

666 represent nonparametric bootstrapped confidence intervals for the mean at the 95% level. To

667 facilitate visualization, data points were jittered; therefore, their absolute position does not reflect

668 the actual value, and values can appear to be below 0.

669

670

671

**A***Author(s) and Year**SMD [95% CI]*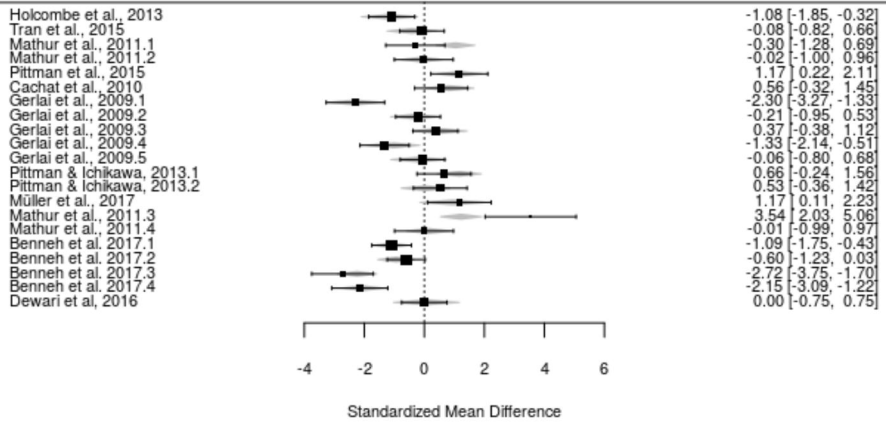**B**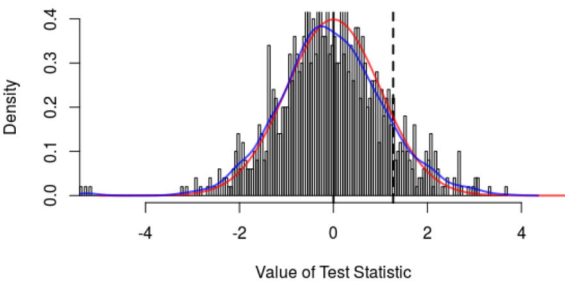**C**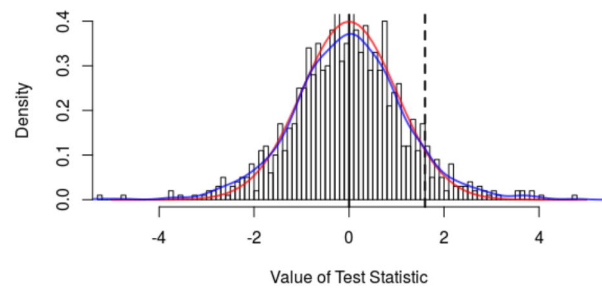**D**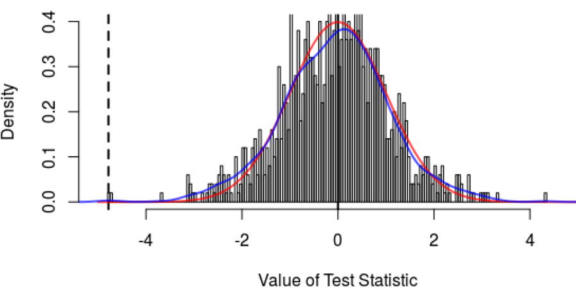**E**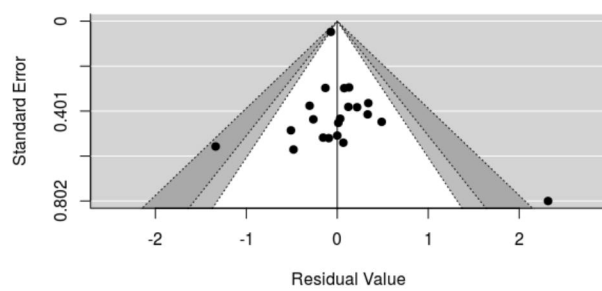**F**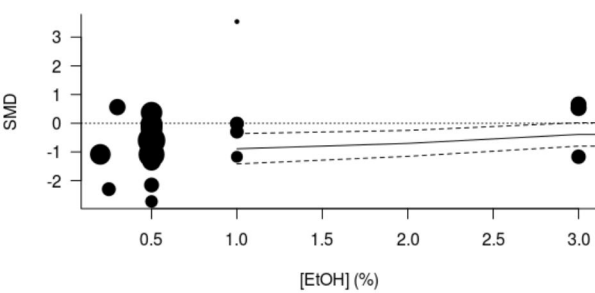**G**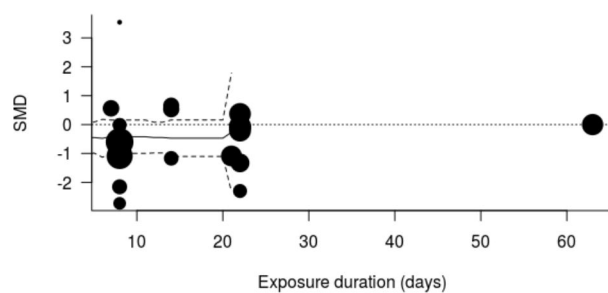





Cumulative risk of seizure

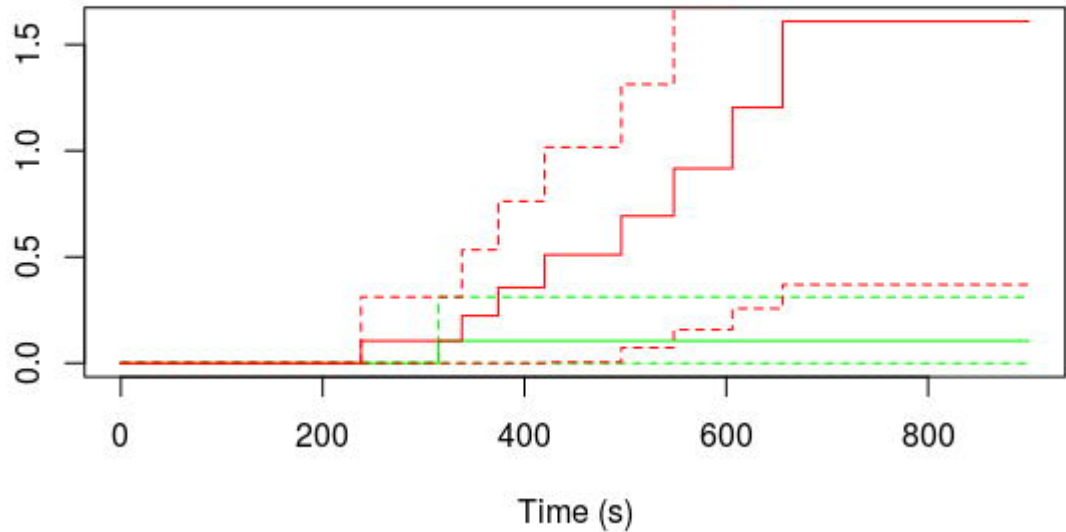

**A**

CAT activity (U per mg protein)

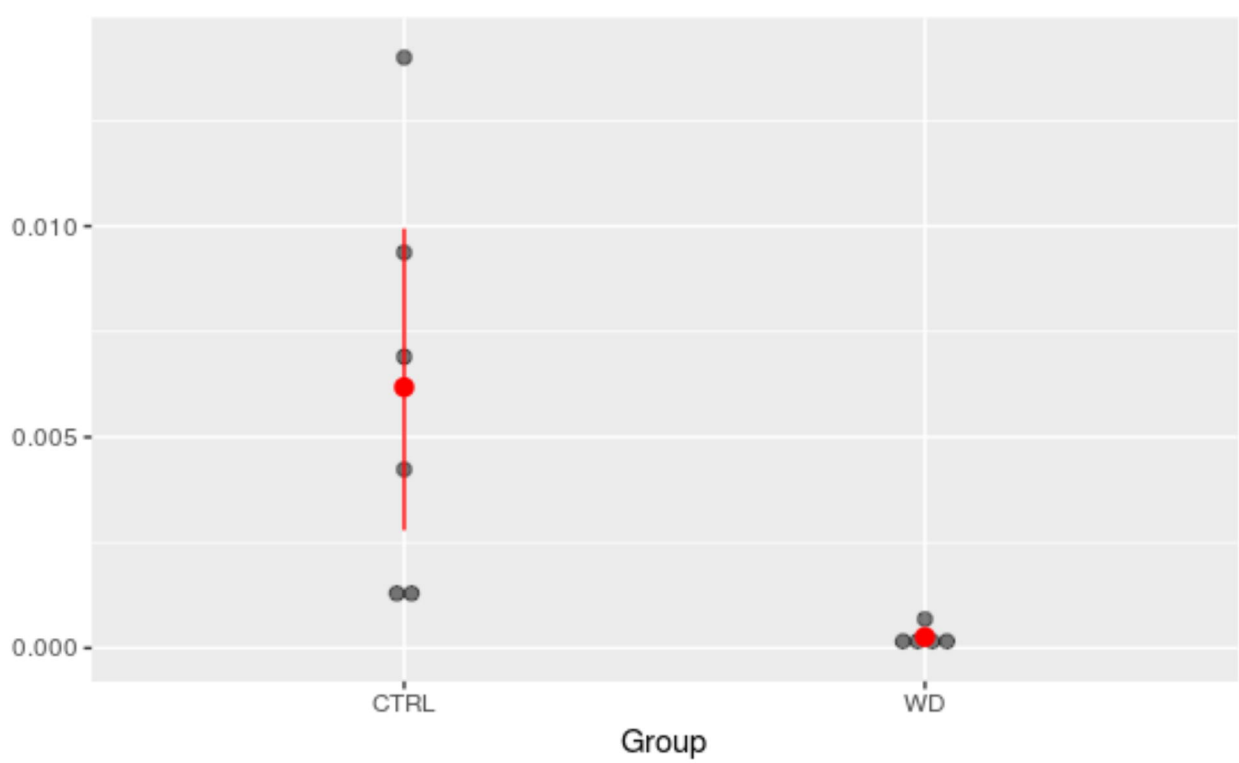**B**

CAT activity (U per mg protein)

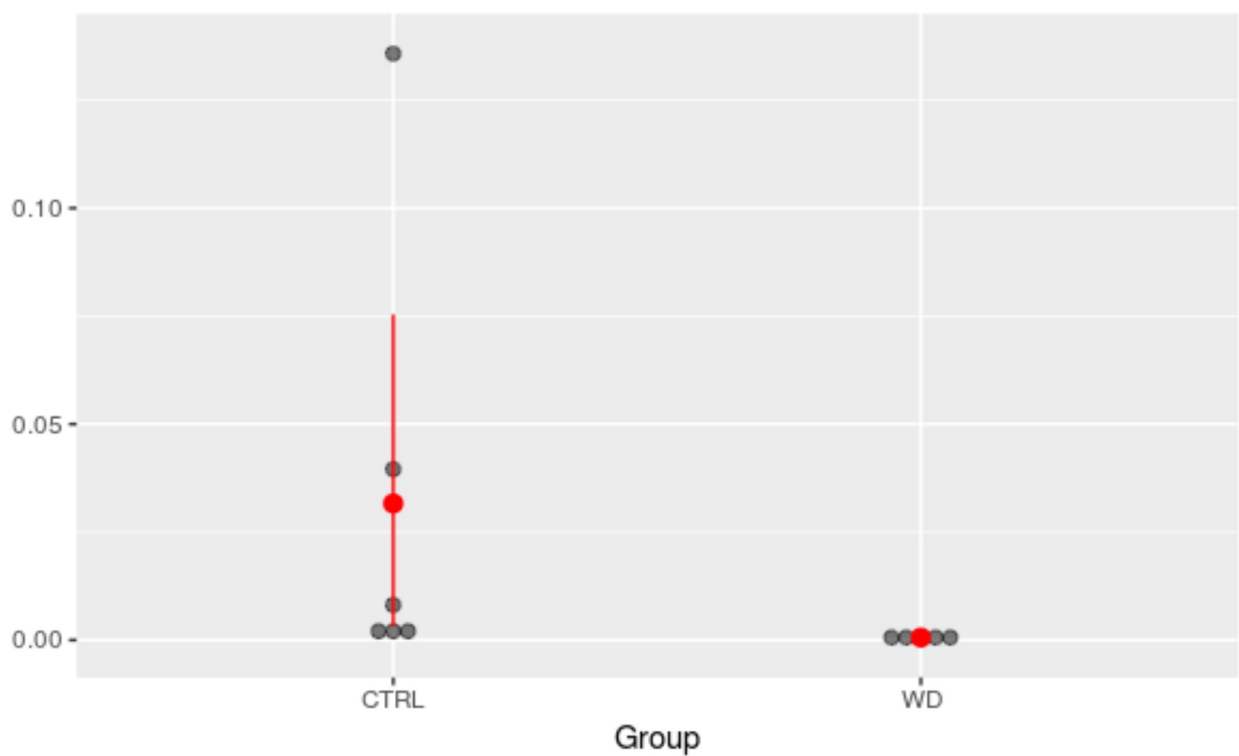

Source: http://biorxiv.org/content/10.1101/201368v2.full.pdf
